## UNIQUE GENETIC PATHWAYS FOR AUTISM

1

1

2

3

### 4 **Characterizing Genetic Pathways Unique to Autism Spectrum Disorder at Multiple Levels** 5 **of Biological Analysis**

6

7 Lukas S. Schaffer<sup>1,2</sup>, Sophie Breunig<sup>1,2</sup>, Jeremy M. Lawrence<sup>1,2</sup>, Isabelle F. Foote<sup>1</sup>, Andrew D.  
8 Grotzinger<sup>1,2</sup>

9

<sup>1</sup> Institute for Behavioral Genetics, University of Colorado Boulder, Boulder, CO

10 <sup>2</sup> Department of Psychology and Neuroscience, University of Colorado Boulder, Boulder, CO

11

## UNIQUE GENETIC PATHWAYS FOR AUTISM

2

### 12 **Abstract**

13 Autism spectrum disorder (ASD) is a neurodevelopmental condition characterized by  
14 atypical patterns of social functioning and repetitive/restricted behaviors. ASD commonly co-  
15 occurs with ADHD and, despite their clinical distinctiveness, the two share considerable genetic  
16 overlap. Given their shared genetic liability, it is unclear which genetic pathways confer unique  
17 risk for ASD independent of ADHD. We applied Genomic Structural Equation Modeling (SEM)  
18 to GWAS summary statistics for ASD and ADHD, decomposing the genetic signal for ASD into  
19 that which is unique to ASD (*uASD*) and that which is shared with ADHD. We computed genetic  
20 correlations between *uASD* and 75 external traits to estimate genetic overlap between *uASD* and  
21 other clinically relevant phenotypes. We went on to apply Stratified Genomic SEM to identify  
22 classes of genes enriched for *uASD*. Finally, we implemented Transcriptome-Wide SEM (T-  
23 SEM) to explore patterns of gene-expression associated with *uASD*. We observed positive  
24 genetic correlations between *uASD* and several external traits, most notably those relating to  
25 cognitive/educational outcomes and internalizing psychiatric traits. Stratified Genomic SEM  
26 showed that heritability for *uASD* was significantly enriched in genes involved in evolutionarily  
27 conserved processes, as well as for a histone mark in the germinal matrix. T-SEM revealed 83  
28 unique genes with expression associated with *uASD*, many of which were novel. These findings  
29 delineate the unique biological underpinnings of ASD which exist independent of ADHD and  
30 demonstrate the utility of Genomic SEM and its extensions for disambiguating shared and  
31 unique risk pathways for genetically overlapping traits.

32

33

34

35

36 **Introduction**

37

38 Autism spectrum disorder (ASD) is a heterogenous neurodevelopmental disorder which  
39 occurs in >1% of the population [1, 2]. While the phenotypic presentation of ASD is highly  
40 variable, it is characterized by two core symptom domains: (i) impairments in social  
41 communication and interaction as well as (ii) repetitive, restricted patterns of behavior or  
42 interests [3]. Although the etiology of ASD involves an array of risk factors, extant literature has  
43 demonstrated a strong genetic component with heritability estimates from twin and family  
44 studies ranging between 64 and 91% [4–6]. A substantial proportion of this heritability (~12%) is  
45 attributable to common genetic variation as evidenced by recent genome-wide association  
46 studies (GWASs) of ASD [2, 7].

47 ASD often presents alongside other neuropsychiatric conditions; the most frequent  
48 comorbidity is attention-deficit/hyperactivity disorder (ADHD) [8], a childhood-onset disorder  
49 characterized by symptoms of either inattention, hyperactivity, or both [3]. Indeed, conservative  
50 estimates suggest that one in every three children with ASD will also meet diagnostic criteria for  
51 ADHD [9]. Converging evidence indicates that a common genetic liability partially underlies  
52 risk for both disorders [10]. For example, observations from family studies find that ASD and  
53 ADHD tend to co-aggregate in families [11], and this co-aggregation is due, in part, to shared  
54 additive genetic influences [12, 13]. These findings are corroborated by molecular and statistical  
55 genetic studies, which have estimated moderate genetic correlations between ASD and ADHD  
56 [2, 10, 14], indicating a shared genetic architecture.

57 These findings illustrate a broad challenge of parsing disorder-specific biological  
58 pathways when two phenotypes are genetically and phenotypically correlated. These difficulties  
59 necessitate the need for multivariate genomic analyses capable of isolating the genetic variance

## UNIQUE GENETIC PATHWAYS FOR AUTISM

4

60 that is unique to a specific trait. Here, we approach these challenges by leveraging Genomic  
61 Structural Equation Modeling (SEM) and its extensions to separate out the genetic signal unique  
62 to ASD from that which is shared with ADHD [15–17]. We model GWAS summary statistics for  
63 ASD and childhood-diagnosed ADHD using a Cholesky decomposition to derive a unique ASD  
64 (henceforth,  $uASD$ ) latent factor, reflecting the residual genetic signal for ASD after removing  
65 genetic overlap with ADHD. We then apply downstream analyses to interrogate the genetic  
66 architecture of  $uASD$  at the genome-wide, functional, and gene-expression levels of analysis.  
67 Collectively, these analyses delineate the biological mechanisms that contribute specifically to  
68 the etiology of ASD and its associated symptoms, as opposed to those that may confer a broader  
69 spectrum of shared neurodevelopmental risk.

70

### 71 **Method**

72

#### 73 *Summary Statistics*

74

75 Summary statistics for ASD were used from the most recent GWAS meta-analysis [2].  
76 Briefly, the original GWAS included 13,076 cases and 22,664 controls from the Danish  
77 population-based cohort iPSYCH and 5,305 cases and 5,305 pseudo-controls (i.e., non-  
78 transmitted parental alleles) from family-based trio samples from the Psychiatric Genomics  
79 Consortium (PGC). Together, the meta-analysis totaled 18 381 ASD cases and 27 969  
80 controls/pseudo-controls. GWAS summary statistics for childhood-diagnosed ADHD were  
81 utilized from the GWAS conducted by Rajagopal et al. (2022), which stratified ADHD cases by  
82 age of diagnosis. Here, we specifically utilize summary statistics for ADHD diagnosed in  
83 childhood due to its higher genetic overlap with ASD compared to persistent or adulthood-  
84 diagnosed ADHD [14, 18]. The childhood-diagnosed GWAS included 14 878 cases and 38 303  
85 controls from the iPSYCH cohort.

## UNIQUE GENETIC PATHWAYS FOR AUTISM

5

86 To evaluate genetic overlap with other relevant phenotypes, we leveraged publicly  
87 available European-ancestry summary statistics for 77 external traits spanning domains of  
88 cognition, psychopathology, health/lifestyle behaviors, interpersonal relations, and physical  
89 activity. We used a SNP-based  $h^2$   $z$ -statistic cutoff of 4, as recommended by the original linkage  
90 disequilibrium score regression (LDSC) developers [19], to limit our pool of external traits to  
91 those with interpretable genetic covariance. Based on this cutoff, 75 of our original 77 traits were  
92 carried forward for analysis. A comprehensive list of included external traits and relevant  
93 characteristics is reported in **Supplementary Table 1**.

### 94 *Genomic Structural Equation Modeling*

95

96 Prior to analysis, all GWAS summary statistics underwent an identical set of QC filters  
97 using the *munge* function in the *GenomicSEM* R package. These filters included restricting  
98 analyses to HapMap3 SNPs and removing SNPs with a minor allele frequency (MAF) < 1% and  
99 imputation score (INFO) < .9 (when available). Once processed, these GWAS summary statistics  
100 were used as input for multivariable LDSC using the *ldsc* function within *GenomicSEM*, which  
101 produces the genetic covariance and sampling covariance matrices across included traits. The  
102 genetic covariance matrix includes the SNP-based heritability ( $h^2_{SNP}$ ) on the diagonal and the  
103 genetic covariances on the off-diagonal. The sampling covariance matrix contains squared  
104 standard errors (sampling variances) on the diagonal and the sampling covariances (sampling  
105 dependencies) on the off-diagonal that will arise in the presence of participant sample overlap.  
106 The sampling covariance matrix is estimated directly from the data using a block jackknife  
107 resampling procedure and allows for GWAS with varying degrees of power and sample overlap  
108 to be included in the same statistical model.

## UNIQUE GENETIC PATHWAYS FOR AUTISM

6

109 For binary traits, estimates were converted to the liability scale using the population  
110 prevalence and the sum of effective sample size across contributing cohorts [20]. For ASD, the  
111 effective sample size was estimated directly from the data. This is because the ASD GWAS used  
112 pseudocontrol subjects, which reduces power to detect GWAS associations, such that using the  
113 observed sum of effective sample size would produce downwardly biased estimates of  
114 heritability [21]. LDSC requires that estimates are produced within a single ancestry group as the  
115 LD weights used to estimate the regression model will vary across ancestral populations. Due to  
116 limited availability of data in other ancestral groups, GWAS statistics were limited to  
117 participants of European ancestry, and the LDSC model was estimated using the 1000 Genomes  
118 Phase 3 European LD scores. These scores excluded the major histocompatibility complex  
119 (MHC) due to complex LD structures in this region that can bias estimates.

120 The output from LDSC was used as input to all subsequent analyses in Genomic SEM.  
121 We began by fitting a Cholesky decomposition model to our observed variables based on GWAS  
122 summary statistics for ASD and childhood-diagnosed ADHD (henceforth, simply referred to as  
123 ADHD). Both ASD and ADHD were regressed onto a latent factor,  $cADHD$ , which represents  
124 the genetic variance of ADHD as well as the proportion of genetic variance for ASD that is  
125 shared with ADHD. ASD was additionally regressed onto  $uASD$ , representing the residual  
126 genetic variance that is unique to ASD after accounting for that which is shared with ADHD. By  
127 construction,  $uASD$  and  $cADHD$  were orthogonal ( $r_g = 0$ ). The genetic residual variances of ASD  
128 and ADHD were fixed to 0 so that all variance in the disorders was explained by the latent  
129 factors. At the genome-wide level, this model was expanded to compute the genetic correlations  
130 between  $uASD$  and each of our pre-selected 75 external traits (see **Supplementary Table 2**). In

## UNIQUE GENETIC PATHWAYS FOR AUTISM

7

131 interpreting the statistical significance of each genetic correlation, we apply a strict Bonferroni-  
132 adjusted significance threshold ( $p < 6.7E-4$ ).

### 133 *Stratified Genomic SEM*

134

135 We applied Stratified Genomic SEM to identify enrichment for functional annotations  
136 (i.e., categories of genes) for *uASD*. We first ran multivariable Stratified LDSC (S-LDSC) to  
137 obtain genetic covariance estimates within each annotation. We originally included a total of 168  
138 annotations for analysis. However, 12 of these annotations were excluded due to the model  
139 failing to converge ( $n = 10$ ) or negative heritability estimates ( $n = 2$ ). The remaining 156 were  
140 examined to ensure that none required a smoothing of the covariance matrix resulting in a  $z$ -  
141 statistic difference  $> 1.96$  (as recommended by Grotzinger et al., 2022) before moving forward.  
142 Our final analysis included 49 annotations from the 1000 Genomes Baseline LD Version 2.2  
143 [22], as well as neuronal and brain tissue annotations from DEPICT [23], gnomAD [24], GTEx  
144 v8 [25], and the Roadmap Epigenomics Project [26] (see **Supplementary Table 3** for full list of  
145 annotations). Using the *enrich* function within *GenomicSEM*, we then estimated enrichment for  
146 *uASD* within each annotation. Enrichment is calculated as the ratio-of-ratios. For the current  
147 analyses, the numerator of this ratio reflects the proportion of *uASD* genetic variance explained  
148 by an annotation (i.e., the within-annotation genetic variance for *uASD* divided by the total *uASD*  
149 genetic variance). The denominator of the ratio reflects the proportional size of the annotation  
150 (i.e., the number of SNPs in the annotation divided by the total number of SNPs analyzed across  
151 all annotations). The null for this enrichment ratio-of-ratios is 1, where values above 1 index  
152 functional annotations that account for a greater proportion of genetic variance in *uASD* than  
153 would be expected based solely on the proportional size of that annotation. Given the non-

## UNIQUE GENETIC PATHWAYS FOR AUTISM

8

154 independent nature of functional annotations, we applied the FDR correction for multiple  
155 comparisons to the accompanying  $p$ -values using the *p.adjust* R package.

### 156 *Transcriptome-Wide SEM (T-SEM)*

157

158 Transcriptome-wide SEM (T-SEM) was applied to identify patterns of gene expression  
159 associated with *uASD*. First, FUSION [27] was used to perform univariate transcriptome-wide  
160 association studies (TWASs) on both ASD and ADHD. We utilized functional weights for 13  
161 brain tissue types from the Genotype Tissue Expression Project (GTEx v8, [28]), two  
162 dorsolateral prefrontal cortex weights from the CommonMind Consortium (CMC, [29]), and one  
163 set of weights for the prefrontal cortex from PsychEncode [30]. This resulted in 16 total  
164 functional weights from which we derived 73 412 genes with imputed expression data across  
165 different brain regions and tissues. These univariate FUSION outputs were then input into the  
166 *read\_fusion* function in Genomic SEM.

167 The gene expression estimates were then added to the LDSC covariance matrix for ASD  
168 and ADHD, and the *userGWAS* function was used to estimate the effect of gene expression on  
169 both *uASD* and *cADHD*. Given the scope of the analyses, we specifically focus on the  
170 relationship between gene expression and *uASD*. Finally, to identify gene sets with significant  
171 enrichment in *uASD*, we used the *WebGestalt* package to conduct an overrepresentation analysis  
172 (ORA, [31]) on significant T-SEM hits. An FDR correction was used in interpreting significance  
173 of T-SEM and ORA results. We also carried forth a drug repurposing analysis on these hits using  
174 methods outlined by Grotzinger et al. 2023. As these analyses did not produce any findings, no  
175 results are reported below.

176

## 177 **Results**

178

179 *Genome-Wide Results Reveal Genetic Correlates of uASD*



## UNIQUE GENETIC PATHWAYS FOR AUTISM

9

180  
181 ASD and ADHD were moderately genetically correlated ( $r_g = .45$ ,  $SE = .05$ ). The  
182 Cholesky decomposition revealed that *cADHD* explained ~20% of the genetic variance in ASD  
183 and *uASD* explained the remaining (~80%) ASD genetic variance (see **Figure 1** for visual  
184 representation of the structural equation model and partitioning of genetic variance). The  
185 remaining analyses sought to clarify what genetically differentiates ASD from ADHD by  
186 examining associations with the *uASD* factor at multiple levels of analysis. We began by  
187 genetically correlating *uASD* with 75 external traits in order to evaluate the extent of genetic  
188 overlap with other phenotypes relevant to mental and physical health. By virtue of our statistical  
189 definition of *uASD*, these correlations represented associations extending above and beyond  
190 those with *cADHD*. A full list of external traits and relevant outputs is available in  
191 **Supplementary Table 2**. Our analyses revealed that *uASD* was significantly correlated with 20  
192 external traits. These 20 correlations tended to span four primary phenotypic dimensions –  
193 cognition, psychopathology, physical movement, and interpersonal relations – that we review  
194 below (and in **Figure 2**, panels **A**, **B**, **C**, and **D**).

195 *Cognition*. Cognitive-related phenotypes demonstrated the most robust genetic  
196 correlations with the latent factor *uASD*, both in statistical significance and magnitude. We  
197 observed positive correlations between *uASD* and educational attainment ( $r_g = .48$ ,  $SE = .05$ ),  
198 childhood intelligence ( $r_g = .45$ ,  $SE = .1$ ), general intelligence ( $r_g = .42$ ,  $SE = .05$ ), noncognitive  
199 skills of educational attainment ( $r_g = .27$ ,  $SE = .05$ ), word reading ( $r_g = .29$ ,  $SE = .08$ ), and verbal  
200 numerical reasoning ( $r_g = .39$ ,  $SE = .05$ ). Interestingly, a number of these traits (childhood  
201 intelligence, noncognitive skills of educational attainment, and word reading) were not found to  
202 be significantly associated with ASD, indicating that *uASD* may be capturing additional genetic  
203 variance uniquely related to cognitive- and education-related traits. While we observed

## UNIQUE GENETIC PATHWAYS FOR AUTISM

10

204 consistent associations with traits indexing intellectual abilities, we did not observe a statistically  
205 significant correlation between *uASD* and the trail-making task B, a well-established measure of  
206 executive functioning [32, 33]. Collectively these cognitive results indicate that the genetic  
207 component unique to ASD is specifically associated with more general cognitive processes  
208 independent of self-regulatory processes.

209 *Psychopathology.* Several psychiatric phenotypes, especially those falling within the  
210 internalizing spectrum, were positively and significantly associated with *uASD*. These included  
211 anxiety ( $r_g = .22$ , SE = .07), major depressive disorder (MDD;  $r_g = .20$ , SE = .05), self-harm ( $r_g =$   
212  $.36$ , SE = .10), consideration of self-harm ( $r_g = .44$ , SE = .08), and sensitivity to environmental  
213 stress and adversity ( $r_g = .16$ , SE = .05). A positive genetic correlation was also observed  
214 between *uASD* and schizophrenia ( $r_g = .22$ , SE = .04). These genetic correlations with  
215 psychopathology were similar in directionality and magnitude to those observed for ASD and  
216 *cADHD*. This suggests that, despite their high level of genetic overlap, ASD and ADHD each  
217 have unique genetic pathways that link them to other forms of psychopathology.

218 Given the shared signal between *uASD* and other psychiatric disorders, we went on to  
219 implement a follow-up model to examine the magnitude of unique genetic signal in ASD after  
220 partialling out genetic overlap with multiple psychiatric disorders. This involved running a  
221 multiple regression model with ADHD, MDD, anxiety, and schizophrenia as correlated  
222 predictors of ASD. The multiple regression model path diagram is visualized in **Supplementary**  
223 **Figure 1** and its output is provided in **Supplementary Table 3**. This model revealed that 74%  
224 of the residual genetic variance in ASD was unexplained by the other psychiatric disorders. This  
225 demonstrates that ASD is not merely a genetic amalgamation of ADHD and other psychiatric

## UNIQUE GENETIC PATHWAYS FOR AUTISM

11

226 disorders, but has a sizable proportion of unique genetic variance distinguishing it from other  
227 forms of psychopathology.

228 *Physical movement.* We examined the genetic correlations with accelerometer data (i.e.,  
229 physical movement) in 1-hour increments across a 24-hour period. This accelerometer data can  
230 be considered a useful indicator of atypical patterns of movement that may reflect disturbances in  
231 sleep and circadian rhythm, wherein these processes have been discussed as transdiagnostic risk  
232 factors for psychiatric and neurodevelopmental disorders [16, 34, 35]. We observed positive  
233 associations between *uASD* and movement at hours 0-1 (i.e., 12:00AM-1:00AM;  $r_g = .29$ , SE =  
234 .08), 21-22 (i.e., 9:00PM-10:00PM;  $r_g = .28$ , SE = .07), 22-23 ( $r_g = .29$ , SE = .08), and 23-24 ( $r_g$   
235 = .44, SE = .08), indicating that this genetic overlap was restricted to movement during periods  
236 of early morning and late night. We also observed overlap between *uASD* and physical inactivity  
237 ( $r_g$  for hours of moderate exercise = -.25, SE = .07).

238 *Interpersonal relations.* A select few traits relating to increased social behavior displayed  
239 genetic correlations with *uASD*. Notably, these positively associated traits tended to revolve  
240 around social relations with family members, such as family satisfaction ( $r_g = .41$ , SE = .07) and  
241 the frequency of friend and family visits ( $r_g = .48$ , SE = .07). Age of first sexual encounter was  
242 also positively genetically correlated with *uASD* ( $r_g = .32$ , SE = .06), and this association was not  
243 observed with ASD.

### 244 *Functional Results Identify uASD Enrichment*

245  
246 Stratified Genomic SEM revealed four significantly enriched functional annotations for  
247 *uASD*. Three of these annotations reflected classes of genes implicated in evolutionarily  
248 conserved processes, including genes conserved in primates ( $p = 1.00E-7$ ), and two annotations  
249 indexing genes conserved in mammals ( $p = 5.68E-4$  and  $9.45E-4$ ). We also found significant

## UNIQUE GENETIC PATHWAYS FOR AUTISM

12

250 enrichment for the H3K4me1 histone mark in the germinal matrix ( $p = 6.20E-4$ ), a transient  
251 brain region present only during gestational brain development (see **Figure 2** and  
252 **Supplementary Table 3** for the magnitude of these enrichments). These annotations represent a  
253 subset of eight significantly enriched annotations in ASD, which also included genes conserved  
254 in vertebrates, as well as enrichment in histone marks in the anterior caudate and fetal male and  
255 female brains. The *cADHD* factor captured 26 significantly enriched annotations which  
256 encompassed all of the annotations observed in *uASD* and ASD, albeit with smaller point  
257 estimates for the evolutionary annotations. Additional significant annotations for *cADHD* were  
258 characterized predominantly by markers for genetic modifications in several brain regions and  
259 hormonal centers. A full list of annotations and their relative enrichments is provided in  
260 **Supplementary Table 3**.

### 261 *T-SEM Uncovers 83 Genes Associated with uASD*

262  
263 We obtained 73 412 gene expression estimates for *uASD* (many of which reflect  
264 expression levels for the same gene in different tissues). T-SEM revealed 278 significant hits  
265 across 83 unique gene IDs; many of these hits were clustered on chromosomes 8 and 17. These  
266 results are visualized as a Miami plot in **Figure 4**. The most highly significant hit corresponded  
267 with the downregulation of *PINXI* ( $z = -5.79$ ,  $p = 6.89E-9$ ), a potent inhibitor of telomerase [36].  
268 The univariate TWAS of ASD revealed 231 significant hits across 69 genes at the same  
269 significance threshold used for the *uASD* T-SEM analysis ( $p < 9.37E-5$ ). The *uASD* T-SEM  
270 revealed 34 novel gene hits relative to the ASD univariate TWAS. Despite subtracting out shared  
271 signal with ADHD, novel genes can arise in this model for genes with particularly discordant  
272 effects across ASD and ADHD.

## UNIQUE GENETIC PATHWAYS FOR AUTISM

13

273 To identify potential biological pathways implicated in *uASD*, we applied ORA to the  
274 significant genes identified by T-SEM. The analysis revealed two gene sets associated with the  
275 *uASD* genes; both of which were implicated in skin-related pathologies. The first set relates to  
276 bacterial skin diseases (enrichment ratio = 74.53,  $p = 6.55E-9$ ). The second set corresponded to  
277 erythema (redness of the skin, often manifesting as a rash) and included all of the genes in the  
278 gene list for bacterial skin diseases, with the exception of *FAM167A* (enrichment ratio = 43.27,  $p$   
279 = 2.20E-6).

280

### 281 **Discussion**

282 The present study leveraged Genomic SEM to dissect the genetic architecture specific to  
283 ASD after accounting for shared genetic variance with another neurodevelopmental disorder,  
284 ADHD diagnosed in childhood. These ADHD summary statistics evince the highest level of  
285 genetic overlap with ASD across the psychiatric space, thereby providing a stringent benchmark  
286 for indexing the genetic variance unique to ASD. We find that the majority of genetic variance in  
287 ASD, as well as genetic overlap with other clinically relevant traits, is unique from ADHD  
288 despite their high levels of genetic overlap [16]. Implementing genome-wide, functional, and  
289 gene-expression analyses, we investigated the unique genetic variance at increasing levels of  
290 biological granularity. At each level, we interrogated this specific variance and identified distinct  
291 biological pathways with specific relevance to ASD.

#### 292 *Genome-Wide Level*

293 Partitioning the genetic variance unique to ASD, we find a plethora of genetic  
294 correlations with cognitive, psychiatric, and other behavioral traits. Notably, we find the  
295 strongest correlations between *uASD* and traits related to cognition and education. While the

## UNIQUE GENETIC PATHWAYS FOR AUTISM

14

296 phenotypic literature surrounding ASD and cognitive abilities is mixed [37–39], our findings that  
297 *uASD* has a positive genetic association with intelligence and educational attainment corroborate  
298 prior genetic studies of ASD [2, 40–42]. Interestingly, we did not see genetic associations with  
299 executive function despite meta-analytic research demonstrating ubiquitous executive  
300 functioning deficits in ASD [43, 44]. Cognitive traits showed some of the more divergent  
301 patterns of association between *uASD* and *cADHD*, with the latter having large and negative  
302 genetic associations with the aforementioned cognitive traits. For many cognitive traits, the  
303 magnitude of the correlations seen with *uASD* surpassed those seen within ASD broadly. Thus, it  
304 appears the genetic variance unique to ASD may have opposing effects to the variance shared  
305 between ASD and ADHD, with the unique component driving correlations in the positive  
306 direction.

307 Contrary to cognitive traits, we observed general convergence in the directionality of  
308 genetic associations with psychiatric traits, especially in those relating to mood or anxiety  
309 disturbances. We therefore conclude that the genetic relationships between ASD and many  
310 psychiatric (especially internalizing) phenotypes are not driven solely by the genetic similarity  
311 between ASD and ADHD. We also show that ASD is not a simple conglomerate of the genetic  
312 components of ADHD and other psychiatric disorders, but rather a genetically distinct construct  
313 within the psychiatric space.

### 314 *Functional Genomic Level*

315 Functional analyses revealed that the genetic signal unique to ASD was concentrated in  
316 evolutionarily conserved genes and the H3K4me1 histone mark in the germinal matrix, a  
317 transitory brain region present during the prenatal period which serves as a hub for neural  
318 progenitor cells [45]. The enrichment of the H3K4me1 histone mark, indicative of active

## UNIQUE GENETIC PATHWAYS FOR AUTISM

15

319 enhancer elements, reinforces the importance of early epigenetic modifications underlying  
320 neurodevelopmental processes in the pathogenesis of ASD [46]. Moreover, our observation of  
321 this unique enrichment underscores the value of employing multivariate genomic analyses to  
322 dissect disorder-specific biological pathways, facilitating a deeper understanding of the  
323 molecular mechanisms underlying ASD etiology.

### 324 *Transcriptome-Wide Level*

325 Transcriptome-wide analyses revealed 83 unique genes with differential expression  
326 linked with ASD independent of ADHD. Notably, we find several novel gene hits unique to  
327 ASD, reflecting genes with highly discordant effects across ASD and ADHD. Focusing on genes  
328 with expression associated with *uASD*, we find overlap with gene sets implicated in two classes  
329 of skin-related pathologies: bacterial skin disease and erythema (non-specific reddening of the  
330 skin). There are well-documented links between ASD and various immune-mediated conditions,  
331 with medical research focusing on the association with atopic dermatitis (i.e., eczema) [47–50].  
332 Dysfunction of the immune system and inflammatory processes have been hypothesized to  
333 contribute jointly to ASD and skin disorders such as atopic dermatitis [51]; however, there is a  
334 dearth of literature apart from the current study which has explicitly identified gene clusters  
335 implicated in both syndromes.

### 336 *Limitations*

337 The current analyses were restricted to GWAS summary statistics derived exclusively  
338 from individuals of European ancestry [52], which hinders the generalizability of our findings  
339 due to differences in allele frequency and LD structure across ancestrally diverse populations  
340 [53]. Efforts to broaden representation in GWAS analyses are crucial for extending genetic  
341 insights to other ancestral groups [54]. It is also critical to recognize that ASD is a highly

## UNIQUE GENETIC PATHWAYS FOR AUTISM

16

342 heterogeneous condition characterized by a broad range of clinical profiles and severity levels  
343 [55, 56]. While these diverse phenotypes of ASD are likely attributable to different genetic  
344 backgrounds [2], the use of a general ASD GWAS restricts our ability to parse any phenotypic  
345 heterogeneity in the sample. Furthermore, many behavioral and psychiatric traits, including  
346 ASD, show discrepancies between family- and SNP-based estimates of heritability [57], with a  
347 component of ASD's missing heritability thought to be driven by rare, high-impact variants  
348 undetected by GWASs [58–60]. It is therefore important to recognize that we are only examining  
349 a subset of the genetic factors thought to independently contribute to ASD etiology.

### 350 *Conclusions*

351 Taken together, we provide insights across multiple levels of biology that characterize the  
352 genetic signal unique to ASD. Relative to ADHD, we find evidence for divergent patterns of  
353 relationships with a range of clinically relevant correlates (e.g., cognition) along with unique  
354 patterns of functional enrichment and gene expression that implicate neurobiological processes  
355 and disease states linked to ASD in the extant literature. While ASD has often been discussed as  
356 unique within the psychiatric space, the current findings clarify and characterize the biological  
357 substrata that differentiate this complex neuropsychiatric disorder.

358

359

360

361

362

363

364



## UNIQUE GENETIC PATHWAYS FOR AUTISM

17

365

### 366 **Acknowledgments**

367           We are extremely grateful for the efforts put forth by the investigators and participants  
368 from data resources such as the Psychiatric Genetics Consortium, iPSYCH, and UK Biobank for  
369 making these analyses possible.

370

### 371 **Conflict of Interests**

372           All authors declare no competing financial interests or conflicts of interest.

373

### 374 **Financial Support**

375           LSS, JML, and ADG are supported by NIH Grant R01MH120219. ADG and IFF are  
376 supported by NIA Grant RF1AG073593.

377

378

## References

- 379 1. Newschaffer CJ, Croen LA, Daniels J, Giarelli E, Grether JK, Levy SE, et al. The  
380 epidemiology of autism spectrum disorders. *Annu Rev Public Health*. 2007;28:235–258.
- 381 2. Grove J, Ripke S, Als TD, Mattheisen M, Walters RK, Won H, et al. Identification of  
382 common genetic risk variants for autism spectrum disorder. *Nat Genet*. 2019;51:431–444.
- 383 3. American Psychiatric Association. (2013). *Diagnostic and statistical manual of mental*  
384 *disorders* (5th ed.). <https://doi.org/10.1176/appi.books.9780890425596>
- 385 4. Tick B, Bolton P, Happé F, Rutter M, Rijsdijk F. Heritability of autism spectrum disorders:  
386 a meta-analysis of twin studies. *J Child Psychol Psychiatry*. 2016;57:585–595.
- 387 5. Sandin S, Lichtenstein P, Kuja-Halkola R, Hultman C, Larsson H, Reichenberg A. The  
388 Heritability of Autism Spectrum Disorder. *JAMA*. 2017;318:1182–1184.
- 389 6. Xie S, Karlsson H, Dalman C, Widman L, Rai D, Gardner RM, et al. The Familial Risk of  
390 Autism Spectrum Disorder with and without Intellectual Disability. *Autism Res*.  
391 2020;13:2242–2250.
- 392 7. Gaugler T, Klei L, Sanders SJ, Bodea CA, Goldberg AP, Lee AB, et al. Most genetic risk  
393 for autism resides with common variation. *Nat Genet*. 2014;46:881–885.
- 394 8. Khachadourian V, Mahjani B, Sandin S, Klevzon A, Buxbaum JD, Reichenberg A, et al.  
395 Comorbidities in autism spectrum disorder and their etiologies. *Transl Psychiatry*.  
396 2023;13:71.
- 397 9. Stevens T, Peng L, Barnard-Brak L. The comorbidity of ADHD in children diagnosed with  
398 autism spectrum disorder. *Res Autism Spectr Disord*. 2016;31:11–18.
- 399 10. Peyre H, Schoeler T, Liu C, Williams CM, Hoertel N, Havdahl A, et al. Combining  
400 multivariate genomic approaches to elucidate the comorbidity between autism spectrum  
401 disorder and attention deficit hyperactivity disorder. *J Child Psychol Psychiatry*.  
402 2021;62:1285–1296.
- 403 11. Ghirardi L, Brikell I, Kuja-Halkola R, Freitag CM, Franke B, Asherson P, et al. The familial  
404 co-aggregation of ASD and ADHD: a register-based cohort study. *Mol Psychiatry*.  
405 2018;23:257–262.
- 406 12. Reiersen AM, Constantino JN, Grimmer M, Martin NG, Todd RD. Evidence for shared  
407 genetic influences on self-reported ADHD and autistic symptoms in young adult Australian  
408 twins. *Twin Res Hum Genet*. 2008;11:579–585.
- 409 13. Ronald A, Simonoff E, Kuntsi J, Asherson P, Plomin R. Evidence for overlapping genetic  
410 influences on autistic and ADHD behaviours in a community twin sample. *J Child Psychol*  
411 *Psychiatry*. 2008;49:535–542.
- 412 14. Rajagopal VM, Duan J, Vilar-Ribó L, Grove J, Zayats T, Ramos-Quiroga JA, et al.  
413 Differences in the genetic architecture of common and rare variants in childhood, persistent  
414 and late-diagnosed attention-deficit hyperactivity disorder. *Nat Genet*. 2022;54:1117–1124.
- 415 15. Grotzinger AD, Rhemtulla M, de Vlaming R, Ritchie SJ, Mallard TT, Hill WD, et al.  
416 Genomic structural equation modelling provides insights into the multivariate genetic  
417 architecture of complex traits. *Nat Hum Behav*. 2019;3:513–525.
- 418 16. Grotzinger AD, Mallard TT, Akingbuwa WA, Ip HF, Adams MJ, Lewis CM, et al. Genetic  
419 architecture of 11 major psychiatric disorders at biobehavioral, functional genomic and  
420 molecular genetic levels of analysis. *Nat Genet*. 2022;54:548–559.

## UNIQUE GENETIC PATHWAYS FOR AUTISM

19

- 421 17. Grotzinger AD, Singh K, Miller-Fleming TW, Lam M, Mallard TT, Chen Y, et al.  
422 Transcriptome-Wide Structural Equation Modeling of 13 Major Psychiatric Disorders for  
423 Cross-Disorder Risk and Drug Repurposing. *JAMA Psychiatry*. 2023;80:811–821.
- 424 18. Breunig S, Lawrence JM, Foote IF, Gebhardt HJ, Willcutt EG, Grotzinger AD. Examining  
425 Differences in the Genetic and Functional Architecture of Attention-Deficit/Hyperactivity  
426 Disorder Diagnosed in Childhood and Adulthood. *Biol Psychiatry Glob Open Sci*.  
427 2024;4:100307.
- 428 19. Bulik-Sullivan B, Finucane HK, Anttila V, Gusev A, Day FR, Loh P-R, et al. An atlas of  
429 genetic correlations across human diseases and traits. *Nat Genet*. 2015;47:1236–1241.
- 430 20. Grotzinger AD, Fuente J de la, Privé F, Nivard MG, Tucker-Drob EM. Pervasive  
431 Downward Bias in Estimates of Liability-Scale Heritability in Genome-wide Association  
432 Study Meta-analysis: A Simple Solution. *Biol Psychiatry*. 2023;93:29–36.
- 433 21. Peyrot WJ, Robinson MR, Penninx BWJH, Wray NR. Exploring Boundaries for the Genetic  
434 Consequences of Assortative Mating for Psychiatric Traits. *JAMA Psychiatry*.  
435 2016;73:1189–1195.
- 436 22. Belsare S, Levy-Sakin M, Mostovoy Y, Durinck S, Chaudhuri S, Xiao M, et al. Evaluating  
437 the quality of the 1000 genomes project data. *BMC Genomics*. 2019;20:620.
- 438 23. Pers TH, Karjalainen JM, Chan Y, Westra H-J, Wood AR, Yang J, et al. Biological  
439 interpretation of genome-wide association studies using predicted gene functions. *Nat*  
440 *Commun*. 2015;6:5890.
- 441 24. Karczewski KJ, Francioli LC, Tiao G, Cummings BB, Alföldi J, Wang Q, et al. The  
442 mutational constraint spectrum quantified from variation in 141,456 humans. *Nature*.  
443 2020;581:434–443.
- 444 25. GTEx Consortium. Human genomics. The Genotype-Tissue Expression (GTEx) pilot  
445 analysis: multitissue gene regulation in humans. *Science*. 2015;348:648–660.
- 446 26. Roadmap Epigenomics Consortium, Kundaje A, Meuleman W, Ernst J, Bilenky M, Yen A,  
447 et al. Integrative analysis of 111 reference human epigenomes. *Nature*. 2015;518:317–330.
- 448 27. Gusev A, Ko A, Shi H, Bhatia G, Chung W, Penninx BWJH, et al. Integrative approaches  
449 for large-scale transcriptome-wide association studies. *Nat Genet*. 2016;48:245–252.
- 450 28. GTEx Consortium. The Genotype-Tissue Expression (GTEx) project. *Nat Genet*.  
451 2013;45:580–585.
- 452 29. Hoffman GE, Bendl J, Voloudakis G, Montgomery KS, Sloofman L, Wang Y-C, et al.  
453 CommonMind Consortium provides transcriptomic and epigenomic data for Schizophrenia  
454 and Bipolar Disorder. *Sci Data*. 2019;6:180.
- 455 30. Gandal MJ, Zhang P, Hadjimichael E, Walker RL, Chen C, Liu S, et al. Transcriptome-  
456 wide isoform-level dysregulation in ASD, schizophrenia, and bipolar disorder. *Science*.  
457 2018;362.
- 458 31. Liao Y, Wang J, Jaehnig EJ, Shi Z, Zhang B. WebGestalt 2019: gene set analysis toolkit  
459 with revamped UIs and APIs. *Nucleic Acids Res*. 2019;47:W199–W205.
- 460 32. Kortte KB, Horner MD, Windham WK. The trail making test, part B: cognitive flexibility  
461 or ability to maintain set? *Appl Neuropsychol*. 2002;9:106–109.
- 462 33. MacPherson SE, Allerhand M, Cox SR, Deary IJ. Individual differences in cognitive  
463 processes underlying Trail Making Test-B performance in old age: The Lothian Birth  
464 Cohort 1936. *Intelligence*. 2019;75:23–32.
- 465 34. Robinson-Shelton A, Malow BA. Sleep Disturbances in Neurodevelopmental Disorders.  
466 *Curr Psychiatry Rep*. 2016;18:6.

## UNIQUE GENETIC PATHWAYS FOR AUTISM

20

- 467 35. Mijster T, Boersma GJ, van Veen MM, Liemburg E, Cath D, Pijnenborg GHM, et al.  
468 Sleep disorders in a naturalistic cohort of Dutch psychiatric outpatients: prevalence rates  
469 and associations with psychopathology symptom severity and well-being. *J Sleep Res.*  
470 2024;33:e14009.
- 471 36. Zhou XZ, Lu KP. The Pin2/TRF1-interacting protein PinX1 is a potent telomerase inhibitor.  
472 *Cell.* 2001;107:347–359.
- 473 37. Joseph RM, Tager-Flusberg H, Lord C. Cognitive profiles and social-communicative  
474 functioning in children with autism spectrum disorder. *J Child Psychol Psychiatry.*  
475 2002;43:807–821.
- 476 38. Frith U, Hill EL, Tager-Flusberg H, Joseph RM. Identifying neurocognitive phenotypes in  
477 autism. *Philos Trans R Soc Lond B Biol Sci.* 2003;358:303–314.
- 478 39. Wolff N, Stroth S, Kamp-Becker I, Roepke S, Roessner V. Autism Spectrum Disorder and  
479 IQ - A Complex Interplay. *Front Psychiatry.* 2022;13:856084.
- 480 40. Clarke T-K, Lupton MK, Fernandez-Pujals AM, Starr J, Davies G, Cox S, et al. Common  
481 polygenic risk for autism spectrum disorder (ASD) is associated with cognitive ability in the  
482 general population. *Mol Psychiatry.* 2016;21:419–425.
- 483 41. Rao S, Baranova A, Yao Y, Wang J, Zhang F. Genetic Relationships between Attention-  
484 Deficit/Hyperactivity Disorder, Autism Spectrum Disorder, and Intelligence.  
485 *Neuropsychobiology.* 2022;81:484–496.
- 486 42. Hatoum AS, Morrison CL, Mitchell EC, Lam M, Benca-Bachman CE, Reineberg AE, et al.  
487 Genome-wide Association Study Shows That Executive Functioning Is Influenced by  
488 GABAergic Processes and Is a Neurocognitive Genetic Correlate of Psychiatric Disorders.  
489 *Biol Psychiatry.* 2023;93:59–70.
- 490 43. Demetriou EA, Lampit A, Quintana DS, Naismith SL, Song YJC, Pye JE, et al. Autism  
491 spectrum disorders: a meta-analysis of executive function. *Mol Psychiatry.* 2018;23:1198–  
492 1204.
- 493 44. Hemmers J, Baethge C, Vogeley K, Falter-Wagner CM. Are Executive Dysfunctions  
494 Relevant for the Autism-Specific Cognitive Profile? *Front Psychiatry.* 2022;13:886588.
- 495 45. Raets MMA, Dudink J, Govaert P. Neonatal disorders of germinal matrix. *J Matern Fetal*  
496 *Neonatal Med.* 2015;28 Suppl 1:2286–2290.
- 497 46. Yoon SH, Choi J, Lee WJ, Do JT. Genetic and Epigenetic Etiology Underlying Autism  
498 Spectrum Disorder. *J Clin Med Res.* 2020;9.
- 499 47. Billeci L, Tonacci A, Tartarisco G, Ruta L, Pioggia G, Gangemi S. Association Between  
500 Atopic Dermatitis and Autism Spectrum Disorders: A Systematic Review. *Am J Clin*  
501 *Dermatol.* 2015;16:371–388.
- 502 48. Zerbo O, Leong A, Barcellos L, Bernal P, Fireman B, Croen LA. Immune mediated  
503 conditions in autism spectrum disorders. *Brain Behav Immun.* 2015;46:232–236.
- 504 49. Jameson C, Boulton KA, Silove N, Guastella AJ. Eczema and related atopic diseases are  
505 associated with increased symptom severity in children with autism spectrum disorder.  
506 *Transl Psychiatry.* 2022;12:415.
- 507 50. Wang B, Li Y-D, Wang Z-Y, Zhao J-Q, Zhang G-Q, Man M-Q. Alterations in Epidermal  
508 Biophysical Properties in Autistic Children. *Skin Pharmacol Physiol.* 2023;36:160–164.
- 509 51. Man M-Q, Yang S, Mauro TM, Zhang G, Zhu T. Link between the skin and autism  
510 spectrum disorder. *Front Psychiatry.* 2023;14:1265472.
- 511 52. Sirugo G, Williams SM, Tishkoff SA. The Missing Diversity in Human Genetic Studies.  
512 *Cell.* 2019;177:26–31.

## UNIQUE GENETIC PATHWAYS FOR AUTISM

21

- 513 53. Martin AR, Kanai M, Kamatani Y, Okada Y, Neale BM, Daly MJ. Clinical use of current  
514 polygenic risk scores may exacerbate health disparities. *Nat Genet.* 2019;51:584–591.
- 515 54. Fatumo S, Chikowore T, Choudhury A, Ayub M, Martin AR, Kuchenbaecker K. A  
516 roadmap to increase diversity in genomic studies. *Nat Med.* 2022;28:243–250.
- 517 55. Masi A, DeMayo MM, Glozier N, Guastella AJ. An Overview of Autism Spectrum  
518 Disorder, Heterogeneity and Treatment Options. *Neurosci Bull.* 2017;33:183–193.
- 519 56. Montgomery A, Masi A, Whitehouse A, Veenstra-VanderWeele J, Shuffrey L, Shen MD, et  
520 al. Identification of subgroups of children in the Australian Autism Biobank using latent  
521 class analysis. *Child Adolesc Psychiatry Ment Health.* 2023;17:27.
- 522 57. Maher B. Personal genomes: The case of the missing heritability. Nature Publishing Group  
523 UK. 2008. <http://dx.doi.org/10.1038/456018a>. Accessed 26 April 2024.
- 524 58. Antaki D, Guevara J, Maihofer AX, Klein M, Gujral M, Grove J, et al. A phenotypic  
525 spectrum of autism is attributable to the combined effects of rare variants, polygenic risk  
526 and sex. *Nat Genet.* 2022;54:1284–1292.
- 527 59. Mollon J, Almasy L, Jacquemont S, Glahn DC. The contribution of copy number variants to  
528 psychiatric symptoms and cognitive ability. *Mol Psychiatry.* 2023. 3 February 2023.  
529 <https://doi.org/10.1038/s41380-023-01978-4>.
- 530 60. More RP, Warriar V, Brunel H, Buckingham C, Smith P, Allison C, et al. Identifying rare  
531 genetic variants in 21 highly multiplex autism families: the role of diagnosis and autistic  
532 traits. *Mol Psychiatry.* 2023;28:2148–2157.

533

534

535

### Figure Notes

536 **Figure 1. Genomic structural equation modeling to decompose ASD genetic variance. (A)**  
537 Cholesky decomposition model producing  $uASD$ , a latent variable encompassing the genetic  
538 variance unique to ASD independent of ADHD, and  $cADHD$ , which captures the residual genetic  
539 variance of ASD (i.e., variance shared between ASD and ADHD) and the genetic variance of  
540 ADHD. **(B)** Donut plot showing the proportion of residual genetic variance unique to ASD  
541 (blue) and shared with childhood ADHD (red).

542

543 **Figure 2. Genetic correlations between  $uASD$  and external traits.** Genetic correlations  
544 between  $uASD$  (blue) and external traits for domains of cognition and education **(A)**, psychiatric  
545 disorders and symptoms **(B)**, and interpersonal traits **(C)**. Traits are sorted top to bottom by  
546 ascending  $p$ -value for the  $uASD$  correlation. **(D)** Genetic correlations between accelerometer-  
547 based average total hourly movement within the 24-hour day beginning at midnight (i.e., hour 1)  
548 and  $uASD$  and  $cADHD$ . Correlations are also shown between external traits and ASD (pink) as  
549 well as  $cADHD$  (red). Error bars represent 95% confidence intervals. Translucent points and  
550 error bars represent genetic correlations that did not surpass the Bonferroni-adjusted significance  
551 threshold. Panel D depicts a LOESS regression line used to visualize overall trends across  
552 individual point estimates. Shaded region around the regression line represents a 95% confidence  
553 interval. Dashed pink line represents the LOESS regression line for genetic correlations with  
554 ASD. EA = educational attainment, EF = executive function, MDD = major depressive disorder,  
555 OCD = obsessive-compulsive disorder, PTSD = post-traumatic stress disorder.

556

557 **Figure 3. Genetic enrichment of  $uASD$  for functional annotations.** Functional annotations are  
558 arranged by ascending  $p$ -value. Enrichment is measured as the ratio of the proportion of genome-  
559 wide relative risk represented by the size of that annotation relative to the entire genome. Null  
560 enrichment value is 1.0 (visualized by dashed vertical line), in which the genetic variance  
561 captured by that annotation is proportional to the expected genetic variance based on annotation  
562 size. Significant enrichments at an FDR threshold are represented by solid blue bars, and error  
563 bars represent the 95% CI around the enrichment estimate. For visualization purposes,  
564 enrichment values are also provided for ASD (pink) and  $cADHD$  (red). Single asterisk (\*)  
565 indicates conserved mammalian genes defined by GERP score. Double asterisk (\*\*) indicates  
566 conserved mammalian genes defined by Lindblad-Toh et al. (2011).

567

568 **Figure 4. Miami plot of gene expression hits for  $uASD$ .** Upper and lower bounds represent the  
569 FDR-adjusted significance threshold ( $p < 9.37E-5$ ). Genes surpassing the upper bound are  
570 upregulated and those below the lower bound are downregulated. Significant hits are colored red  
571 and labeled with gene ID names.

572

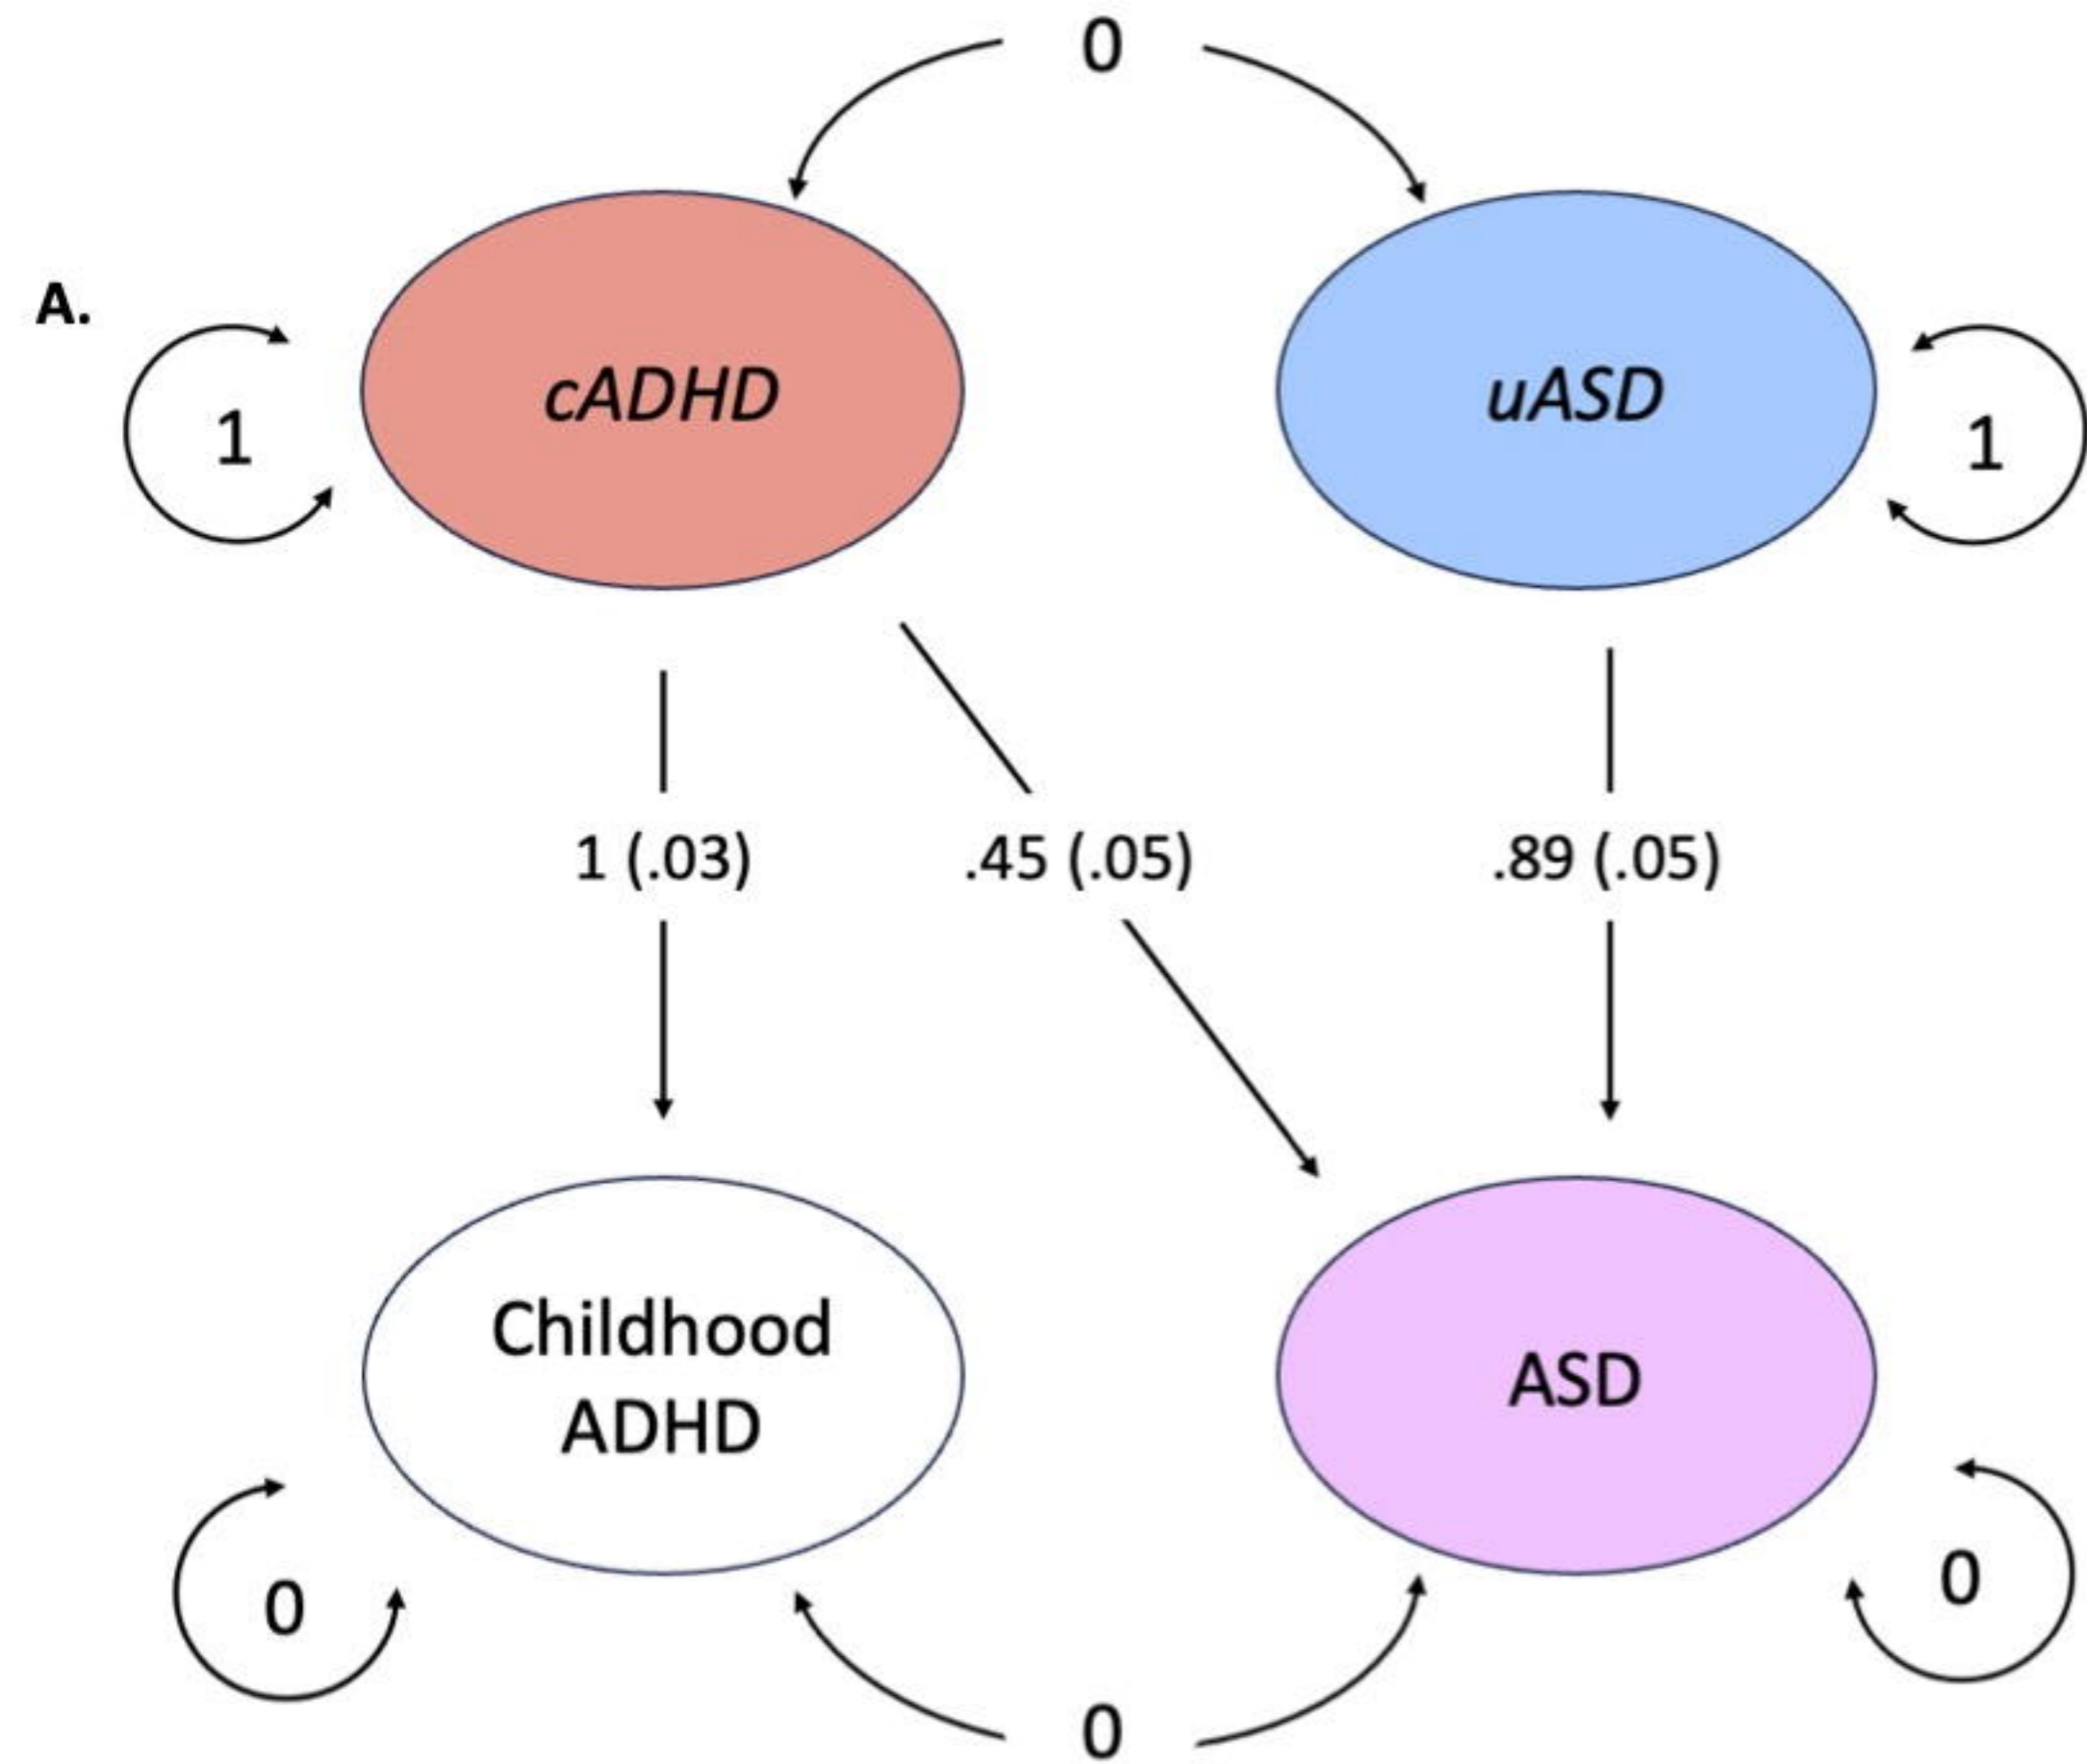

**B.**

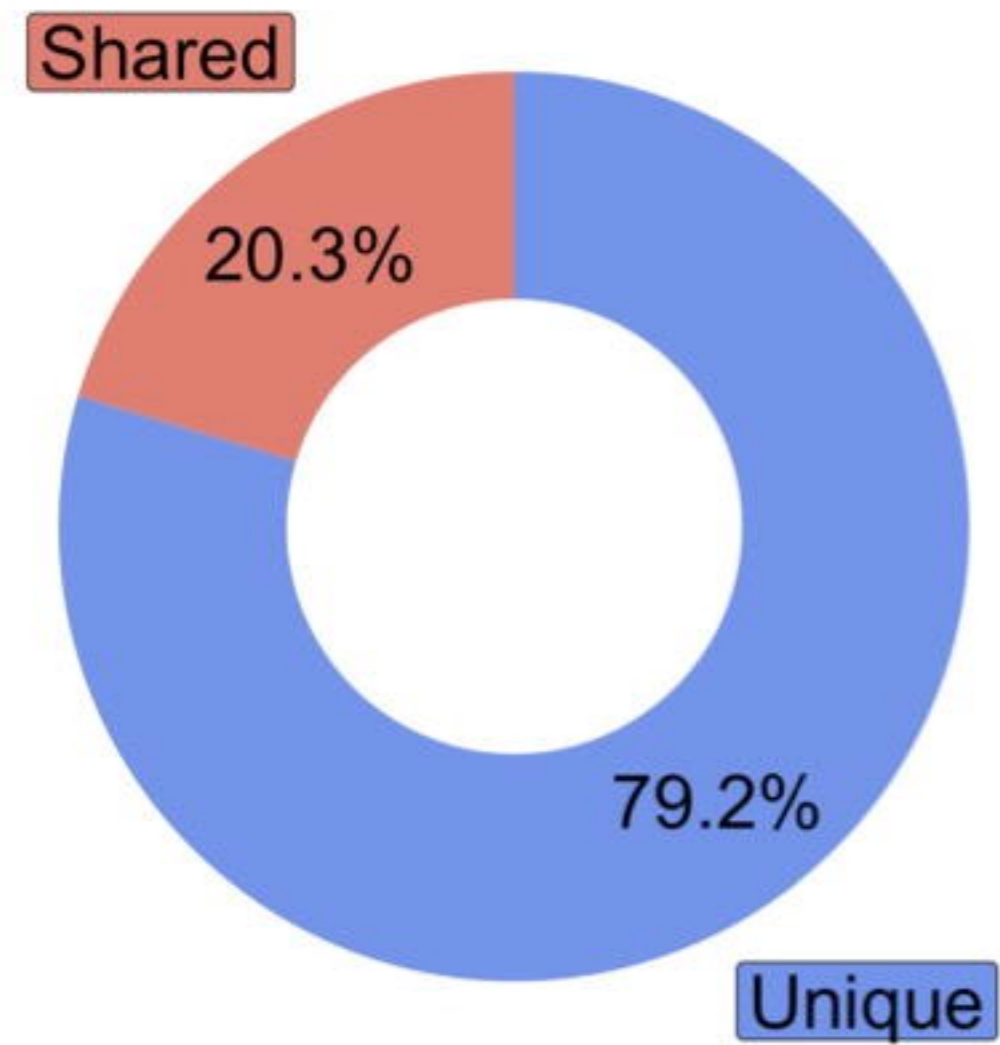

### A. Cognition & Education

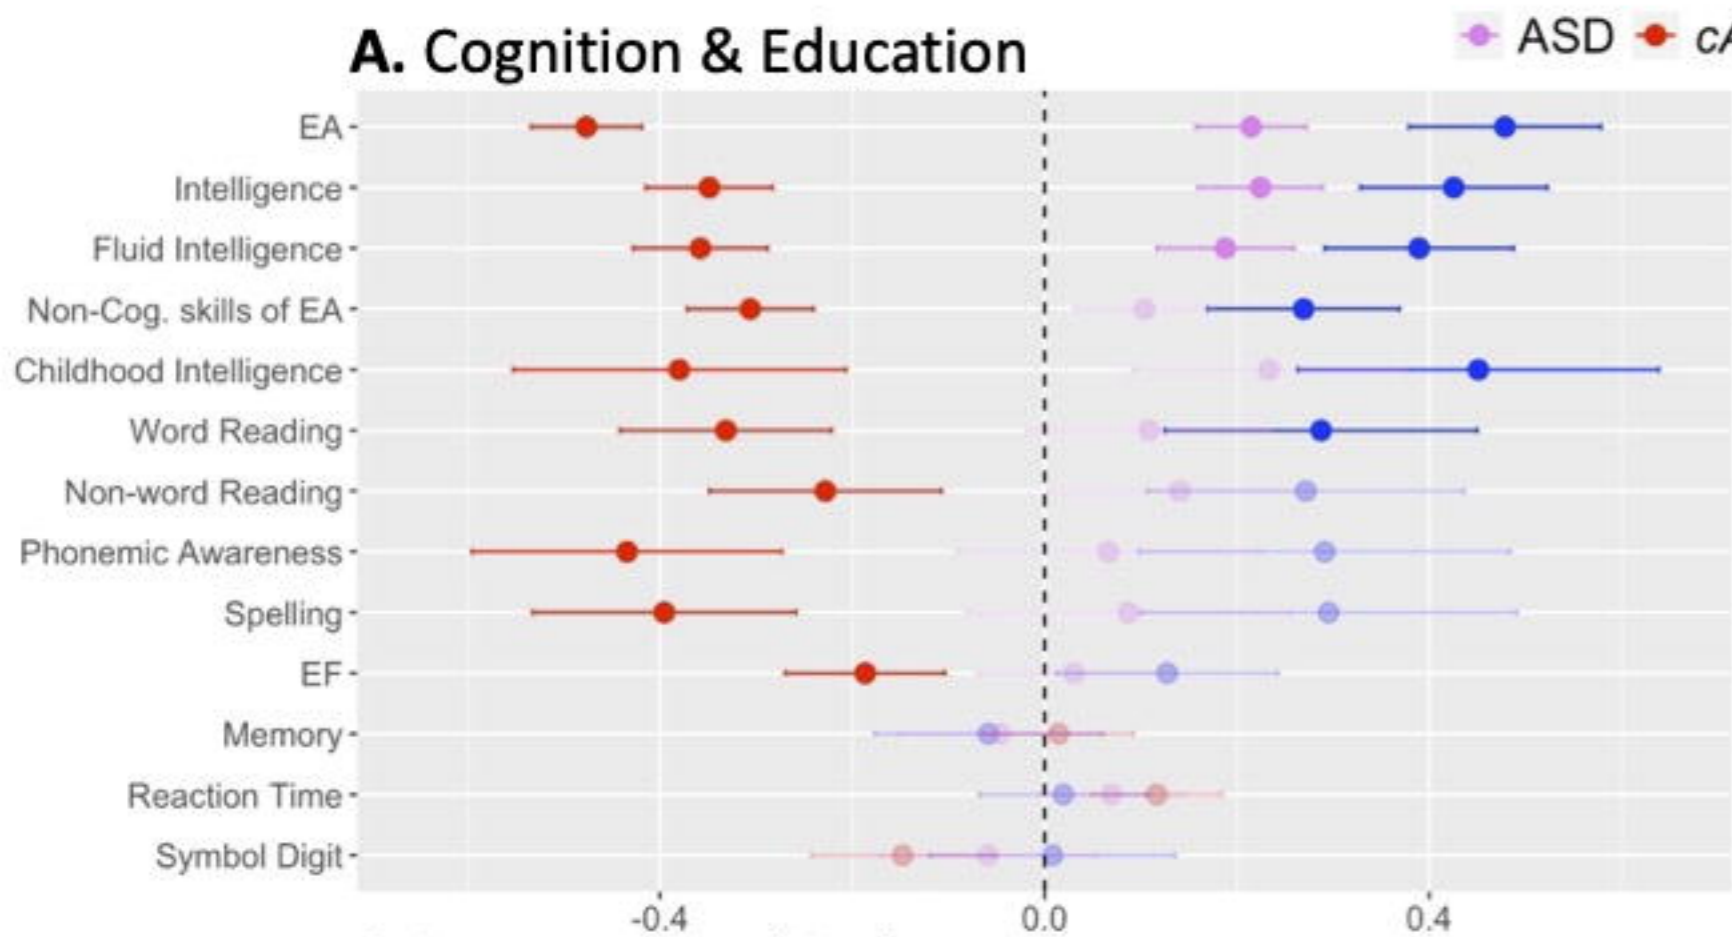

### B. Psychiatric Disorders & Symptoms

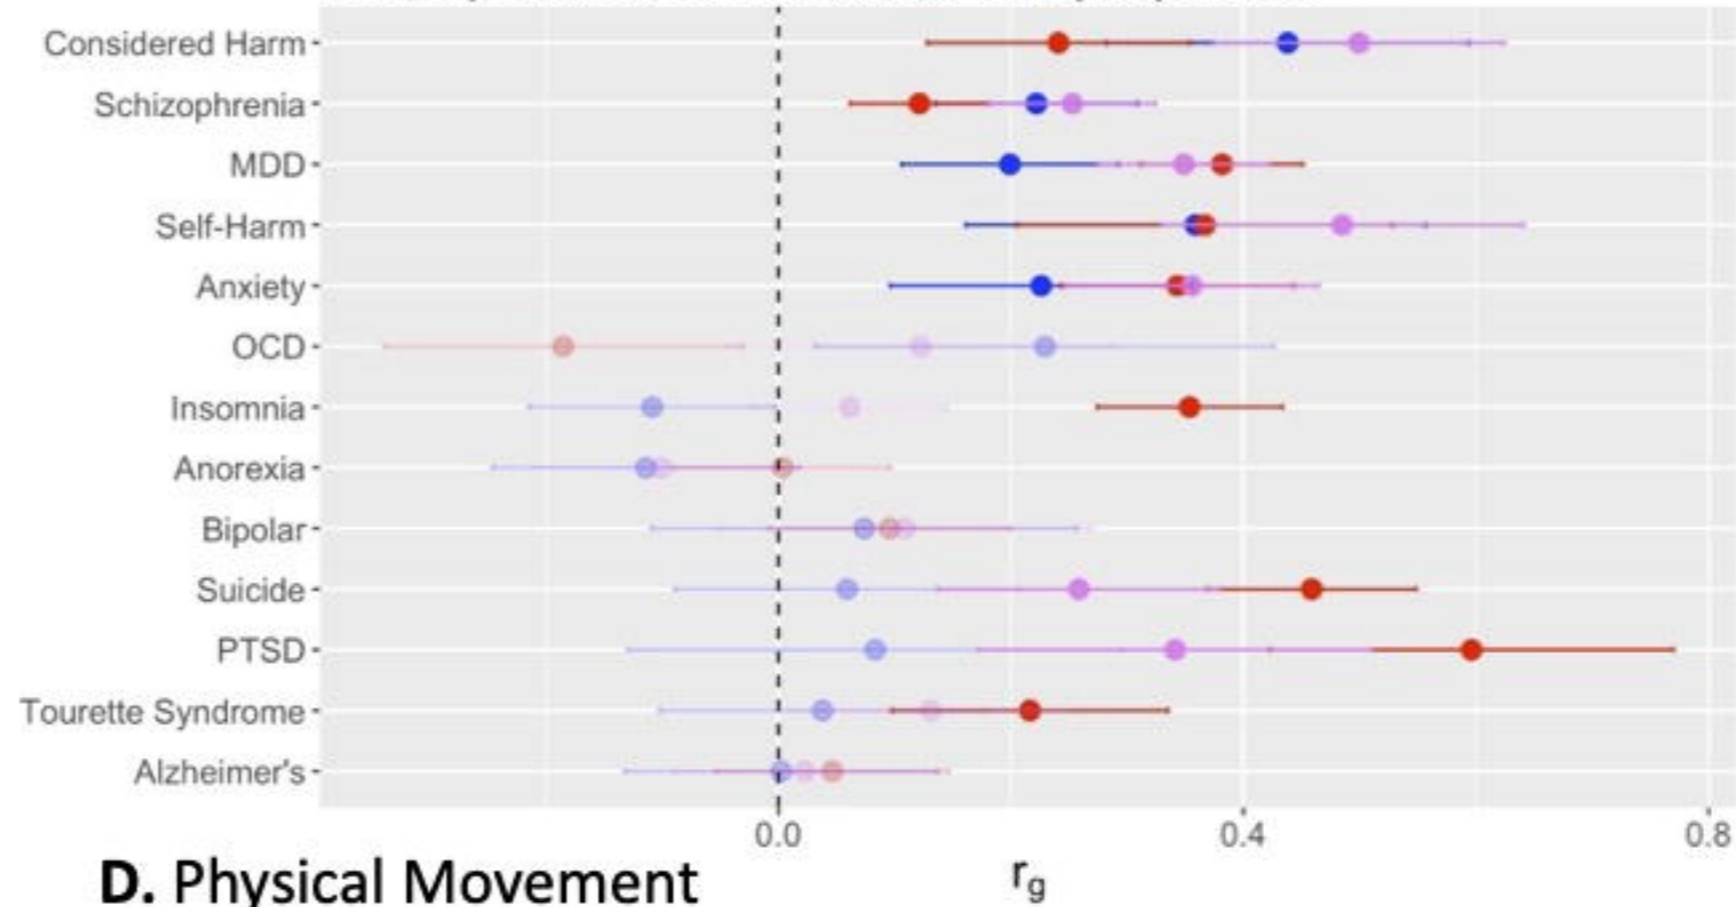

### C. Interpersonal Traits

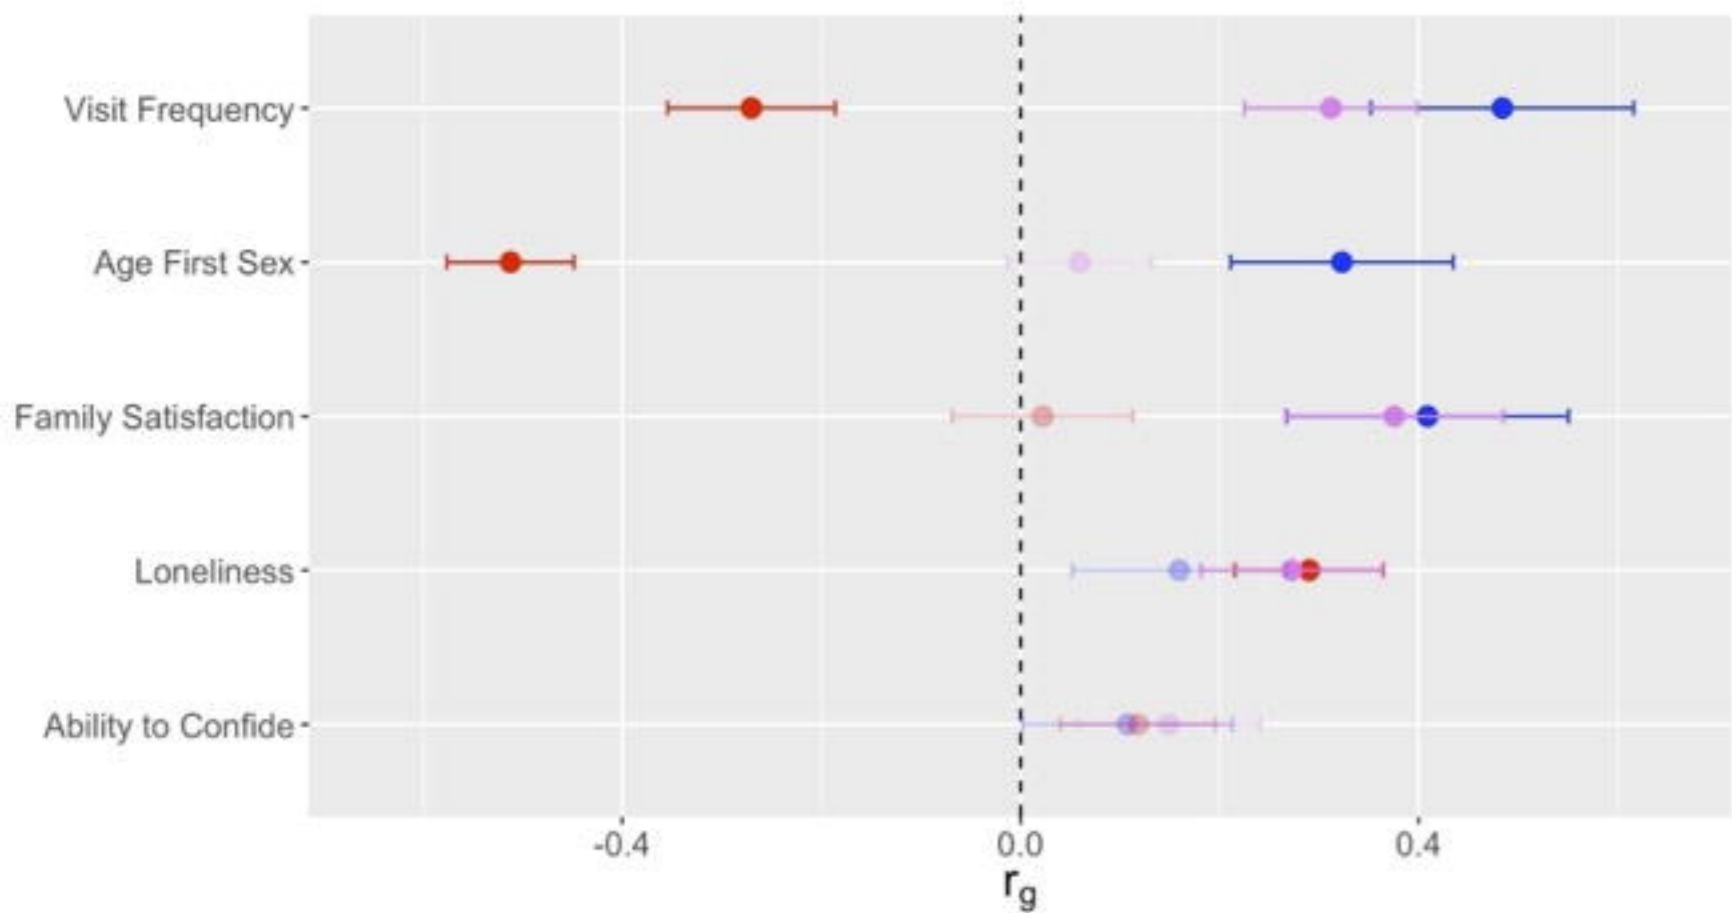

### D. Physical Movement

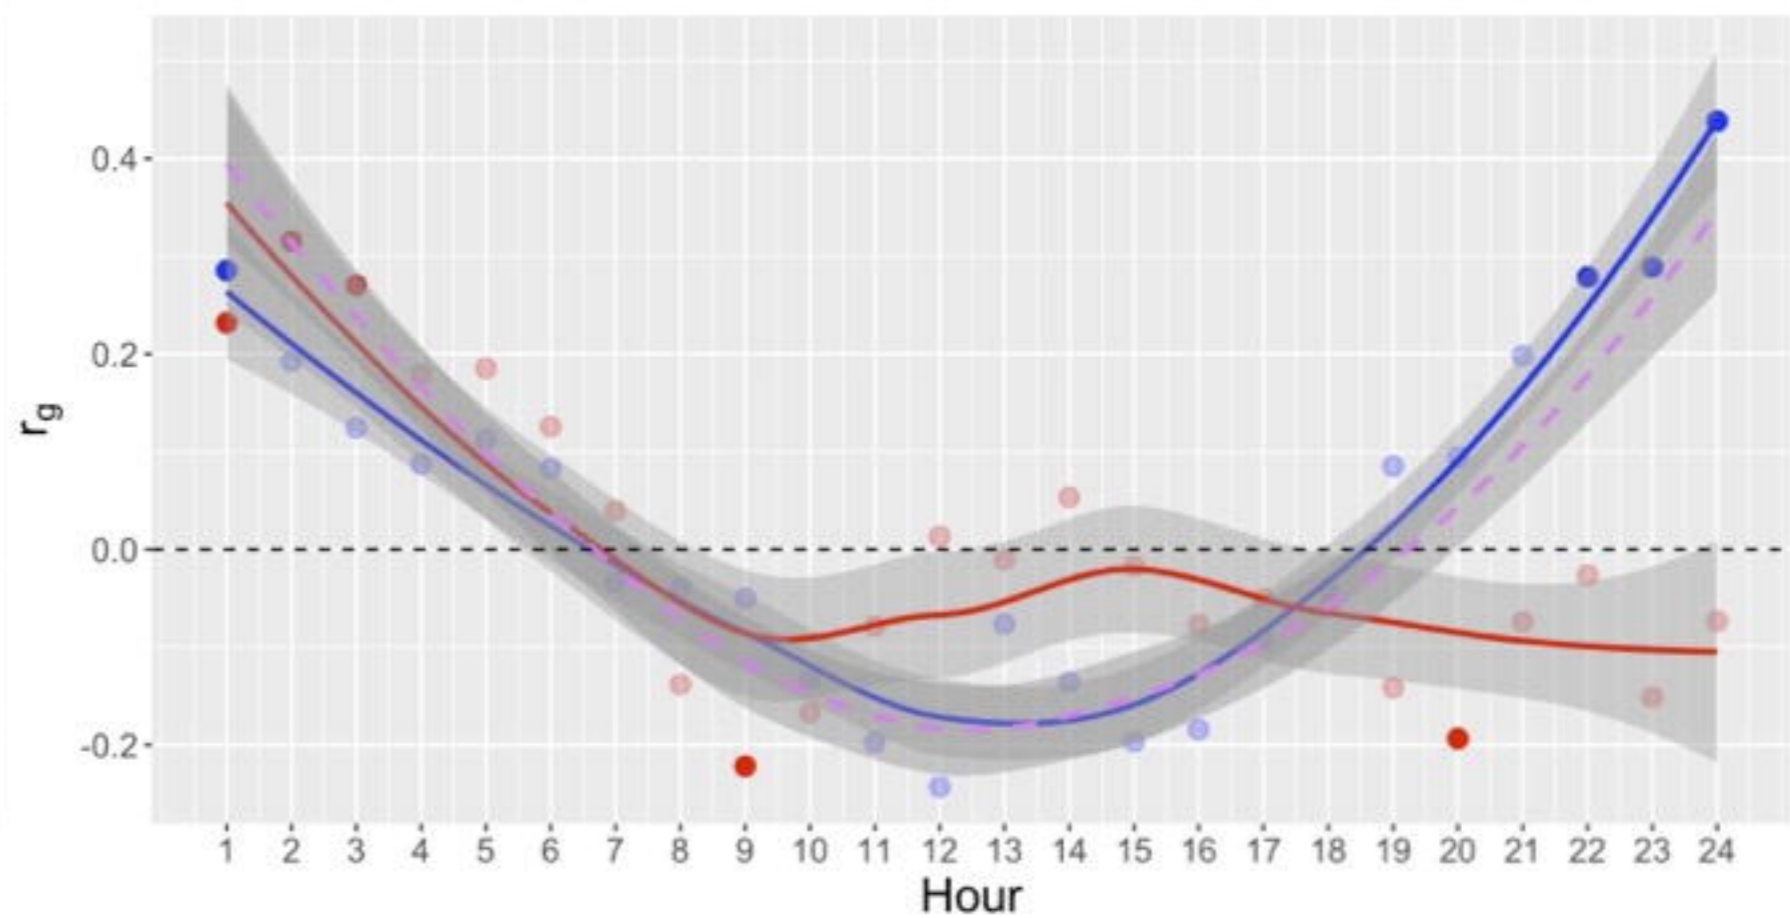



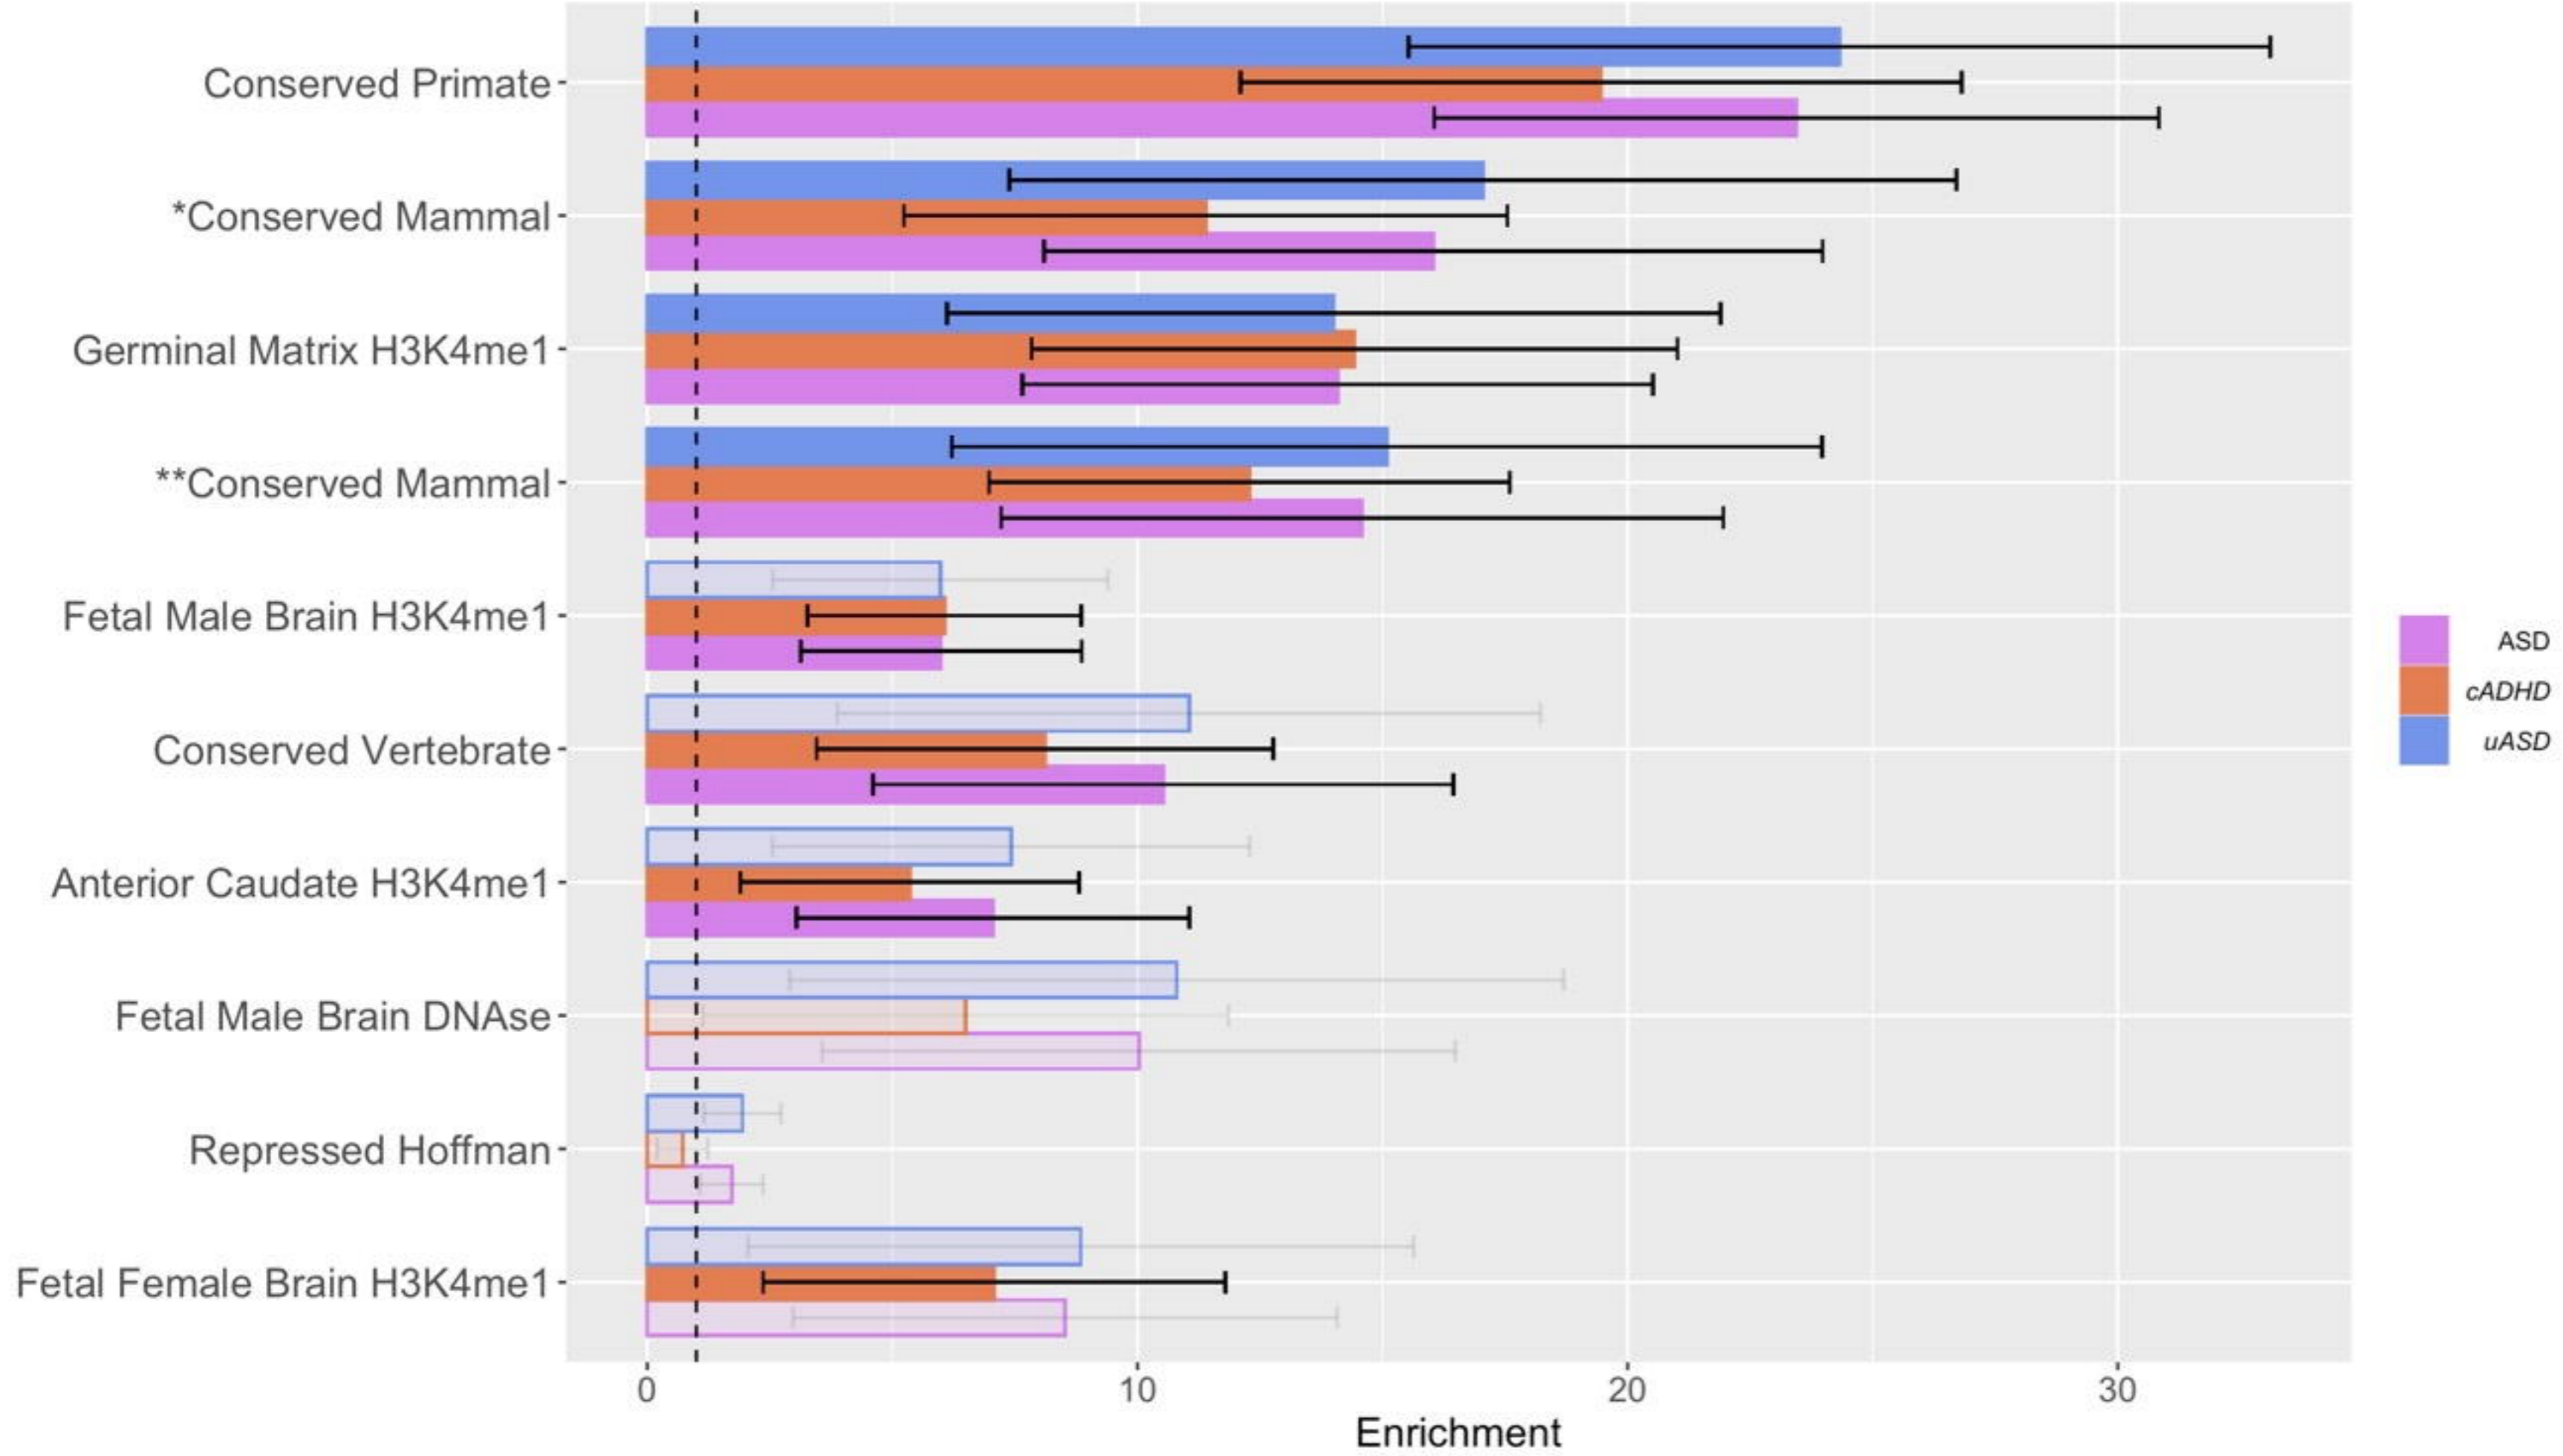

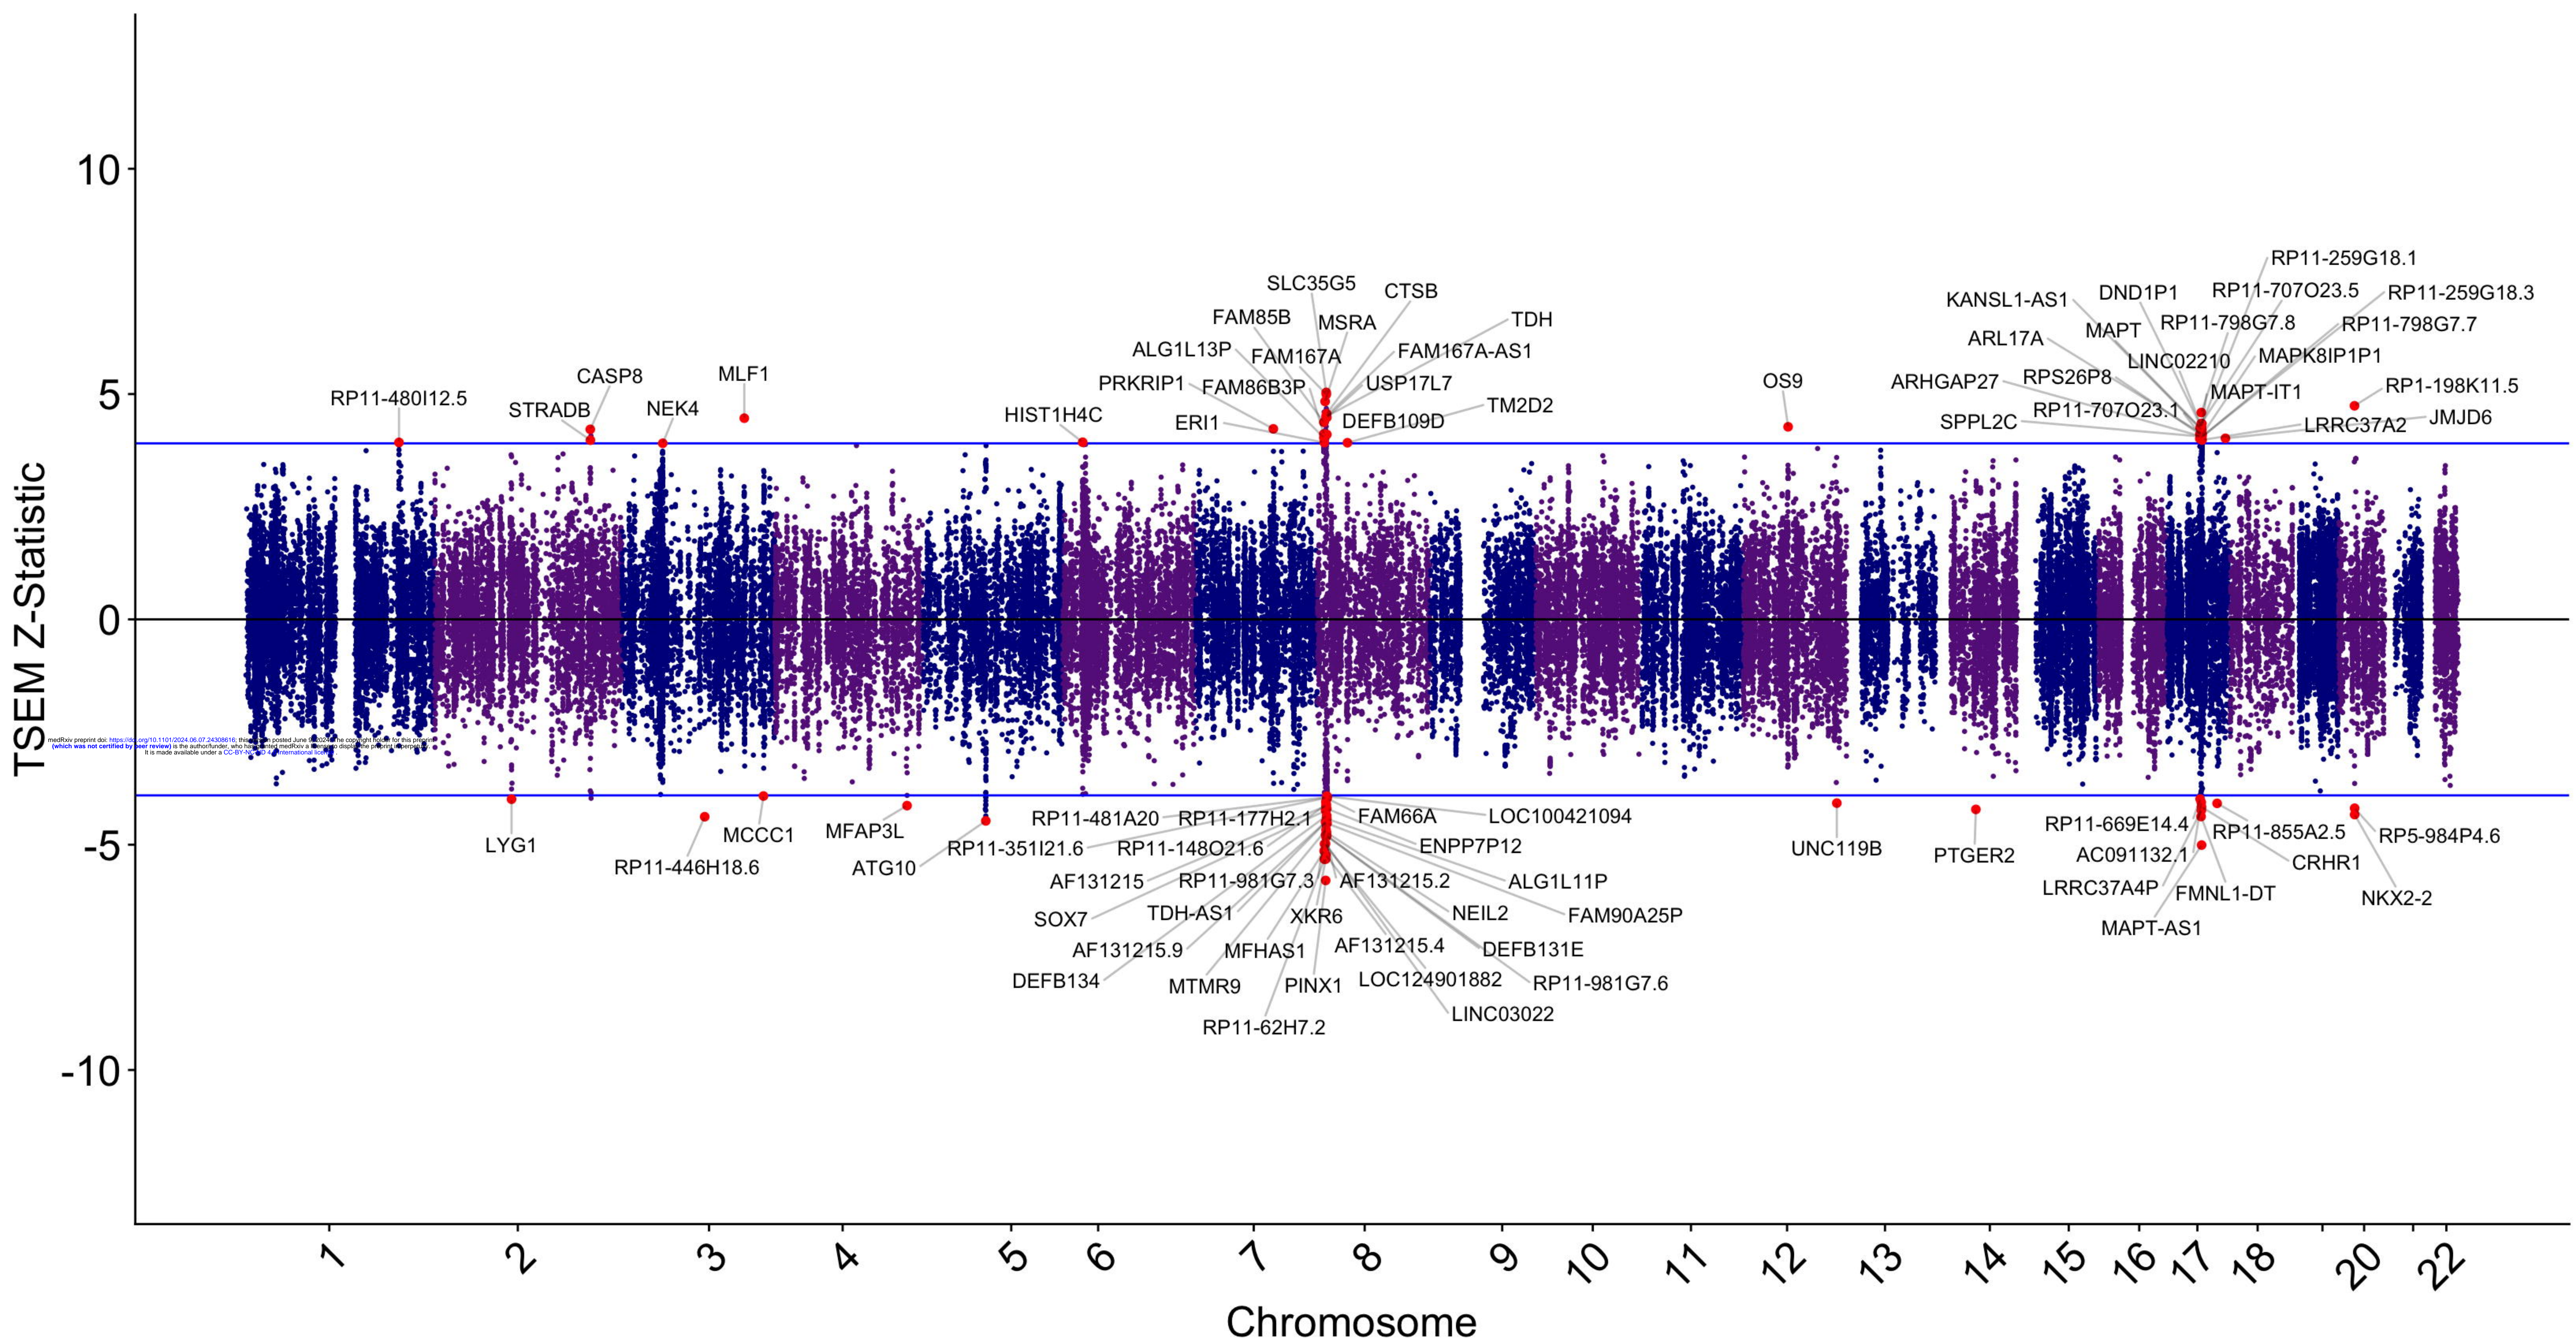

Source: https://medrxiv.org/content/10.1101/2024.06.07.24308616v1.full.pdf
